# Supplementary material
Source: Research Square preprint supplement (doi:10.21203/rs.3.rs-9640365/v1)
Supplement: Supplementary file 1 [file 5df0e6caeb6dcfb042b8be7b.docx]

Supplementary. Table S1. Chemical composition of volatile organic compounds (VOCs) from *Teucrium dunense* litter and from the germination chamber atmosphere

| **Table S1. Chemical composition of volatile organic compounds (VOCs) from *Teucrium dunense* litter and from the germination chamber atmosphere** | | | | | |
| --- | --- | --- | --- | --- | --- |
|  | **Litter** | | | | **Chamber atmosphere** |
| **Compound/Month** | **September** | **December** | **February** | **April** |  |
| 1-Octen-3-ol | - | - | **-** | **-** | 0,09 ± 0,05 |
| **Aliphalic alcohols** | **0** | **0** | **0** | **0** | **0,1** |
| a-thujene | 2,23 ± 0,27 | 0,21 ± 0,18 | - | - | 0,7 ± 0,53 |
| a-pinene | 16,60 ± 2,56 | 15,48 ± 2,66 | 0,21 ± 0,02 | 0,26 ± 0,08 | 14,3 ± 0,95 |
| α-fenchene | - | - | - | - | 0,3 ± 0 |
| sabinene | 6,81 ± 2,56 | 5,24 ± 0,84 | - | - | 3,6 ± 0,85 |
| b-pinene | 11,11 ± 1,77 | 11,14 ± 1,61 | 0,23 ± 0,01 | 0,13 ± 0,12 | 1,5 ± 0,38 |
| β-myrcene | 3,92 ± 0,74 | 3,05 ± 1,00 | - | - | 2,3 ± 0,61 |
| p-cymene | 1,32 ± 0,18 | 1,67 ± 0,13 | - | - | 0,6 ± 0,32 |
| limonene | 5,43 ± 1,02 | 3,67 ± 0,35 | 0,28 ± 0,,6 | 0,18 ± 0,30 | 1,4 ± 0,33 |
| terpinolene | - | - | - | - | 0,2 ± 0,08 |
| **Monoterpene hydrocarbons** | **47,43** | **40,46** | **0,72** | **0,56** | **23,7** |
| cis-sabinenhydrate | - | - | 0,89 ± 0,09 | 0,67 ± 0,51 | - |
| linalool oxyde | 0,89 ± 0,25 | 1,05 ± 0,34 | - | - | 0,1 ± 0 |
| linalool | 1,55 ± 0,65 | 0,82 ± 0,78 | 2,61 ± 0,43 | 1,67 ± 1,37 | 1,3 ± 0,39 |
| thujone | - | - | - | - | 0,2 ± 0,05 |
| α-campholenal | - | - | 0,13 ± 0,03 | 0,05 ± 0,09 | - |
| pinocarveol | - | - | 3,75 ± 0,06 | 5,02 ± 0,99 | - |
| trans-verbenol | 2,34 ± 0,29 | 4,83 ± 0,63 | 4,95 ± 0,34 | 3,52 ± 3,10 | - |
| sabine-ketone | 2,91 ± 0,53 | 5,33 ± 0,89 | 1,53 ± 0,159 | 1,12 ± 0,91 | - |
| terpinen-4-ol | - | - | 0,81 ± 0,37 | 0,20 ± 0,17 | 0,3 ± 0,13 |
| pinocarvone | 0,85 ± 0,21 | 1,78 ± 1,37 | - | - | - |
| p-cymen-8-ol | 1,68 ± 0,15 | 1,11 ± 0,47 | 3,44 ± 0,46 | 1,73 ± 1,35 | - |
| myrtenol | - | - | 3,38 ± 0,41 | 2,88 ± 1,98 | 0,3 ± 0,41 |
| verbenone | 1,36 ± 0,61 | 2,31 ± 0,14 | 2,15 ± 0,34 | 2,25 ± 0,57 | - |
| trans-carveol | 1,04 ± 011 | 3,29 ± 1,28 | - | - | - |
| p-cymen-7-ol | - | - | 0,05 ± 0,09 | - | - |
| a-terpineol acetate | - | - | 0,50 ± 0,15 | 0,15 ± 0,15 | - |
| geranyl acetate |  | - | - | - | 0,1 ± 0 |
| **Oxigenated Monoterpenes** | **12,62** | **20,51** | **24,38** | **19,47** | **2,31** |
| α-cubebene | - | - | - | - | 1,4 ± 0,39 |
| ylangene | - | - | - | - | 0,1 ± 0,03 |
| a-copaene | - | - | 0,30 ± 0,02 | 0,14 ± 0,12 | - |
| β-bourbonene | 0,26 ± 0,23 | 1,88 ± 0,23 | 1,09 ± 0,10 | 0,68 ± 0,07 | - |
| β-elemene | - | - | - | - | 0,3 ± 0,09 |
| α-amorphene | - | - | - | - | 1,1 ± 0,95 |
| β-caryophyllene | 5,73 ± 0,89 | 6,64 ± 0,77 | 8,49 ± 0,55 | 10,28 ± 1,51 | 26,5 ± 3,29 |
| β-cubebene | - | - | - | - | 0,6 ± 0,34 |
| (+)-Aromadendrene | - | - | - | - | 0,4 ± 0,18 |
| α-bergamotene | - | - | - | - | 0,5 ± 0,56 |
| α-humulene | - | - | 5,79 ± 0,42 | 7,5 ±1,05 | 9,0 ± 1,24 |
| trans-β-farnesene | 3,00 ± 2,24 | 4,14 ± 0,52 | - | - | 7,0 ± 0,94 |
| α-amorphene | - | - | - | - | 0,4 ± 0,16 |
| alloaromadendrene | - | - | - | - | 1,1 ± 0,14 |
| germacrene D | 3,54 ± 0,39 | 4,69 ± 0,60 | 9,55 ± 0,99 | 8,52 ± 1,50 | 12,9 ± 1,82 |
| valencene | 1,00 ± 0,20 | 0,78 ± 0,24 | - | - | - |
| γ-Elemene |  |  |  |  | 2,2 ± 0,48 |
| bicyclogermacrene | 2,59 ± 0,41 | 3,46 ± 0,41 | 5,83 ± 0,68 | 5,05 ± 1,10 | - |
| (E,E)-α-farnesene | - | - | 0,25 ± 0,08 | 0,17 ± 0,19 | - |
| γ-muurolene | - | - | - | - | 0,2 ± 0,09 |
| γ-selinene | - | - | - | - | 0,1 ± 0 |
| viridiflorene | - | - | - | - | 0,5 ± 0,34 |
| calamenene <1,11-epoxide> | - | - | 2,48 ± 0,23 | 2,44 ± 0,31 | - |
| α-cadinene | - | - | - | - | 0,2 ± 0,24 |
| γ-cadinene | - | - | 0,64 ± 0,05 | 0,65 ± 0,16 | 1,3 ± 0,94 |
| δ-cadinene | 2,36 ± 0,79 | - | 3,74 ± 0,16 | 3,31 ± 0,55 | 4,3 ± 1,54 |
| calamene | - | - | - | - |  |
| cadalene | - | - | 1,83 ± 0,21 | 1,25 ± 0,32 | - |
| **Sesquiterpene hydrocarbons** | **18,9** | **21,55** | **39,99** | **40,09** | **70,10** |
| (E)-nerolidol | 7,66 ± 2,84 | - | 4,41 ± 1,11 | 3,62 ± 1,33 | 0,5 ± 0,16 |
| spathulenol | 1,78 ± 0,19 | 4,42 ± 0,98 | 0,34 ± 0,23 | 0,42 ± 0,24 | - |
| caryophyllene oxide | 2,90 ± 0,23 | 8,77 ± 1,95 | 10,38 ± 0,66 | 11,87 ± 2,57 | - |
| humulene epoxide II | - | - | 1,45 ± 0,66 | 1,68 ± 0,36 | - |
| t-cadinol | 3,06 ± 0,50 | 2,27 ± 0,68 | 4,95 ± 0,53 | 5,33 ± 1,36 | - |
| a-cadinol | 0,98 ± 0,76 | 1,23 ± 0,34 | 2,40 ± 0,35 | 2,79 ± 0,70 | - |
| calamenen-10-ol <cis> | - | - | 0,23 ± 0,28 | 0,56 ± 0,100 | - |
| a-bisabolol | - | - | 0,04 ± 0,03 | 0,17 ± 0,07 | - |
| calamenen-10-one | - | - | 0,16 ± 0,13 | - | - |
| **Oxigenated sesquiterpenes** | ***16,38*** | ***16,69*** | ***24,36*** | ***26,44*** | **0,50** |
| phenyl ethyl alcohol | - | - | 0,16 ± 0,02 | 0,11 ± ,010 | - |
| methyl benzoate | **-** | **-** | **-** | **-** | 0,2 ± 0,08 |
| benzene, 1,2-diethyl | **-** | **-** | **-** | **-** | 0,4 ± 0,19 |
| benzoic acid, 2-hydroxy | **-** | **-** | **-** | **-** | 0,4 ± 0,12 |
| methyl eugenol | **-** | **-** | **-** | **-** | 0,2 ± 0,17 |
| **Phenylpropanoids** | **0** | **0** | **0,16** | **0,11** | **1,20** |
| **Total identified** | **93,34** | **99,21** | **89,45** | **86,46** | **97,93** |

Supplementary. Table 2 (S2). Chemical composition of volatile organic compounds (VOCs) from *Helichrysum stoechas* fresh litter (n=5).

| Supplementary Table S2. Chemical composition of volatile organic compounds (VOCs) from *Helichrysum stoechas* fresh litter (n=5). | |
| --- | --- |
| **Compound** | **Media (%) ± SD** |
| α-pinene | 28,0 ± 1,84 |
| Limonene | 1,5 ± 0,09 |
| α-terpinene | 0,1 ± 0,07 |
| o-cymene | 0,1 ± 0,02 |
| Terpinolene | 0,5 ± 0,03 |
| **Monoterpenes Hydrocarbons** | **30,1** |
| Linalyil acetate | 0,2 ± 0,29 |
| Linalool | 0,2 ± 0,01 |
| **Oxygenated Monoterpenes** | **0,4** |
| α-cubebene | 1,6 ± 0,14 |
| (-)-isoledene | 0,3 ± 1,01 |
| α-copaene | 4,7 ± 0,08 |
| di-epi-a-cedrene | 2,6 ± 0,28 |
| β-caryophyllene | 7,4 ± 0,14 |
| +-aromadendrene | 2,4 ± 1,14 |
| β-parasinsene | 1,0 ± 0,09 |
| γ-cadinene | 0,5 ± 0,14 |
| δ-cadinene | 2,7 ± 0,05 |
| α-caryophyllene | 0,9 ± 0,08 |
| α-muurolene | 4,7 ± 0,05 |
| α-amorphene | 1,5 ± 2,05 |
| Viridiflorene | 4,0 ± 1,01 |
| Alloaromadendrene | 10,5 ± 0,15 |
| α-cedrene | 0,5 ± 0,54 |
| α-gurjunene | 2,9 ± 0,09 |
| α-curcumene | 2,3 ± 0,07 |
| Hexahydro naphtalene | 0,3 ± 0,12 |
| α-cadinene | 0,2 ± 0,15 |
| Calamenene | 0,2 ± 0,09 |
| **Sesquiterpenes Hydrocarbonated** | **50,7** |
| Palustrol | 0,3 ± 0,13 |
| Ledol | 0,9 ± 0,08 |
| **Oxygenated Sesquiterpenes** | **1,2** |
| 3-hexen-1-ol | 0,3 ± 0,13 |
| **Others** | **0,3** |
| **Total Identified** | **82.7** |
